# Supplementary material for: Survival, Growth, and Reproduction: Comparison of Marbled Crayfish with Four Prominent Crayfish Invaders
Source: MDPI journal article supplement (doi:10.3390/biology10050422), 2021-05-10
Supplement: s1 [file s1]

# Survival, Growth, and Reproduction: Comparison of Marbled Crayfish with Four Prominent Crayfish Invaders

Antonín Kouba <sup>1,\*</sup>, Boris Lipták <sup>1</sup>, Jan Kubec <sup>1</sup>, Martin Bláha <sup>1</sup>, Lukáš Veselý <sup>1</sup>, Phillip J. Haubrock <sup>1,2</sup>, Francisco J. Oficialdegui <sup>3</sup>, Hamid Niksirat <sup>1</sup>, Jiří Patoka <sup>4</sup> and Miloš Buřič <sup>1</sup>

<sup>1</sup> South Bohemian Research Center of Aquaculture and Biodiversity of Hydrocenoses, Faculty of Fisheries and Protection of Waters, University of South Bohemia in České Budějovice, Zátiší 728/II, 38925 Vodňany, Czech Republic; liptak.b@gmail.com (B.L.); kubecj@frov.jcu.cz (J.K.); blaha@frov.jcu.cz (M. Bláha); veselyl@frov.jcu.cz (L.V.); phillip.haubrock@senckenberg.de (P.J.H.); niksirat@frov.jcu.cz (H.N.); buric@frov.jcu.cz (M. Buřič)

<sup>2</sup> Department of River Ecology and Conservation, Senckenberg Research Institute and Natural History Museum Frankfurt, Clamecystrasse 12, 63571 Gelnhausen, Germany

<sup>3</sup> Department of Wetland Ecology, Doñana Biological Station (EBD-CSIC), C/Américo Vespucio 26, Isla de la Cartuja, 41092 Seville, Spain; oficialdegui@ebd.csic.es

<sup>4</sup> Department of Zoology and Fisheries, Faculty of Agrobiological, Food and Natural Resources, Czech University of Life Sciences Prague, Kamýcká 129, 16500 Prague-Suchbát, Czech Republic; patoka@af.czu.cz

\* Correspondence: akouba@frov.jcu.cz

**Table S1.** The estimated share of abundances of planktonic organisms provided to crayfish compared to marbled crayfish during the first six weeks of experimental trials.

| Compared crayfish    | Organism                                        | Proportion (%) |
|----------------------|-------------------------------------------------|----------------|
| Spiny-cheek crayfish | <i>Daphnia magna</i>                            | 30             |
|                      | <i>D. pulicaria</i>                             | 25             |
|                      | <i>D. galeata</i>                               | 10             |
|                      | <i>Ceriodaphnia</i> sp.                         | 10             |
|                      | <i>Eudiaptomus</i> sp.                          | 10             |
|                      | <i>Volvox</i> sp.                               | 10             |
|                      | <i>Scapholeberis mucronata</i>                  | 5              |
| Signal crayfish      | <i>Bosmina longirostris</i>                     | 50             |
| &                    | <i>Cyclops vicinus</i> (adults and copepodites) | 49             |
| Red swamp crayfish   | <i>Chydorus ovalis</i> , <i>Alona</i> sp.       | < 1            |
| Common yabby         | <i>B. longirostris</i>                          | 98             |
|                      | <i>Acanthocyclops americanus</i>                | 1              |
|                      | <i>Daphnia longispina</i>                       | < 1            |

**Table S2.** The output of the Kaplan-Meier survival analysis of marbled crayfish – MC in trials with spiny-cheek crayfish – SCC (A), signal crayfish – SC (B), common yabby – CY (C), and red swamp crayfish – RSC (D) kept in single-species and mixed stocks through the experiment.

| Trial | Test                    | Chisq | df | p      |
|-------|-------------------------|-------|----|--------|
| A     | Overall                 | 8.1   | 3  | 0.04   |
|       | MC single vs SCC single | 2     | 1  | 0.2    |
|       | MC mixed vs SCC mixed   | 4.5   | 1  | 0.03   |
|       | MC single MC mixed      | 0     | 1  | 0.8    |
|       | SCC single vs SCC mixed | 1.8   | 1  | 0.2    |
| B     | Overall                 | 10.3  | 3  | 0.02   |
|       | MC single vs SC single  | 3.1   | 1  | 0.08   |
|       | MC mixed vs SC mixed    | 4.7   | 1  | 0.03   |
|       | MC single MC mixed      | 2.1   | 1  | 0.2    |
|       | SC single vs SC mixed   | 0.1   | 1  | 0.7    |
| C     | Overall                 | 63.8  | 3  | <0.001 |
|       | MC single vs CY single  | 8.2   | 1  | 0.004  |
|       | MC mixed vs CY mixed    | 21.4  | 1  | <0.001 |
|       | MC single MC mixed      | 55.5  | 1  | <0.001 |
|       | CY single vs CY mixed   | 0.5   | 1  | 0.5    |
| D     | Overall                 | 14    | 3  | 0.003  |
|       | MC single vs RSC single | 4.2   | 1  | 0.04   |
|       | MC mixed vs RSC mixed   | 4.2   | 1  | 0.04   |
|       | MC single MC mixed      | 0.2   | 1  | 0.7    |
|       | RSC single vs RSC mixed | 13.8  | 1  | <0.001 |

**Table S3.** The output of the GLM with quasibinomial distribution on the incidence of individuals with missing and/or regenerating claws of marbled crayfish – in trials with spiny-cheek crayfish – A, signal crayfish – B, common yabby – C, and red swamp crayfish – D kept in tested assemblages through the experiment.

| <b>Trial</b> | <b>Test</b>               | <b>F</b> | <b>df</b> | <b>p</b> |
|--------------|---------------------------|----------|-----------|----------|
| A            | Time                      | 5.560    | 5         | < 0.001  |
|              | Species assemblage        | 0.506    | 3         | 0.678    |
|              | Time × Species assemblage | 2.012    | 15        | 0.012    |
| B            | Time                      | 8.978    | 5         | < 0.001  |
|              | Species assemblage        | 17.002   | 3         | < 0.001  |
|              | Time × Species assemblage | 2.216    | 15        | 0.005    |
| C            | Time                      | 21.740   | 5         | < 0.001  |
|              | Species assemblage        | 16.684   | 3         | < 0.001  |
|              | Time × Species assemblage | 1.869    | 15        | 0.022    |
| D            | Time                      | 24.342   | 5         | < 0.001  |
|              | Species assemblage        | 23.464   | 3         | < 0.001  |
|              | Time × Species assemblage | 2.098    | 12        | 0.015    |

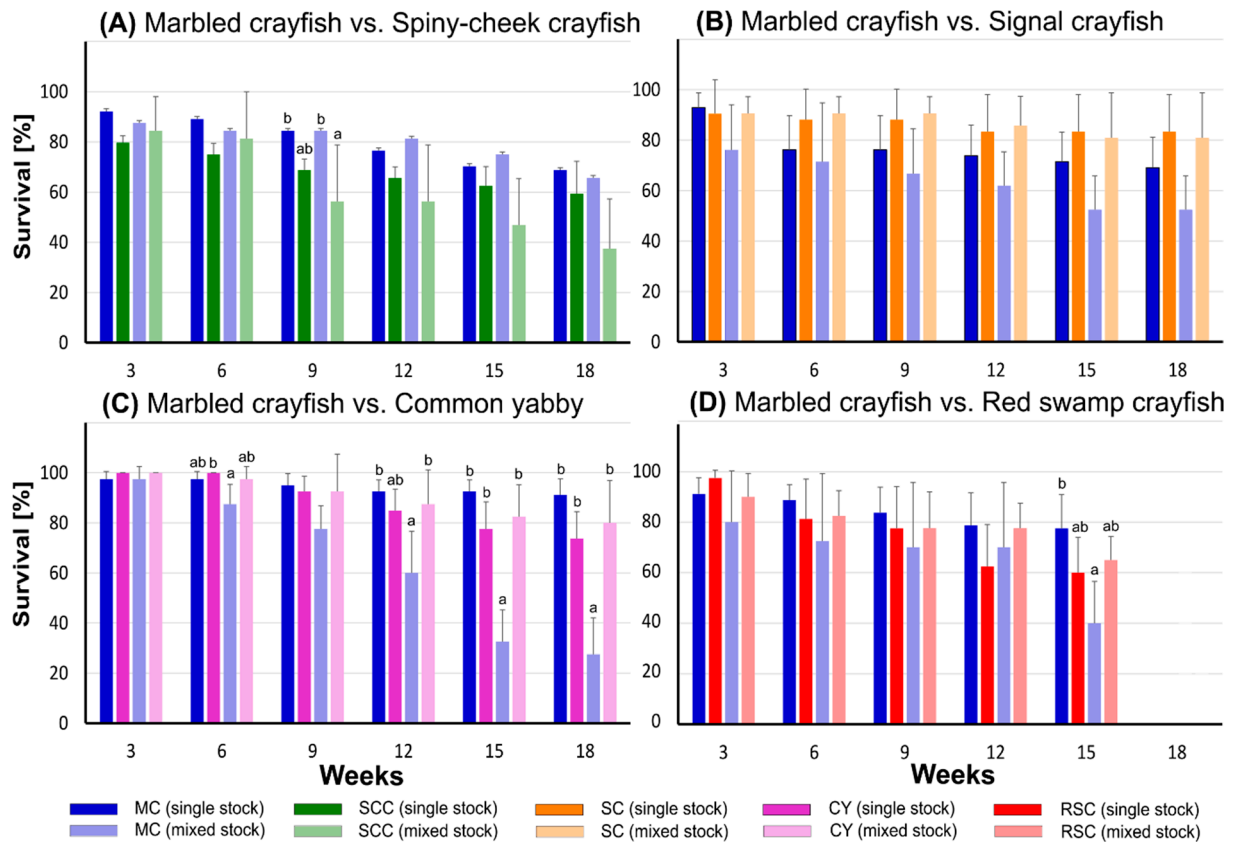

**Figure S1.** Survival (%) of marbled crayfish – MC in trials with spiny-cheek crayfish – SCC (A), signal crayfish – SC (B), common yabby – CY (C), and red swamp crayfish – RSC (D) kept in single-species and mixed stocks through the experiment (note darker and lighter colors used for single and mixed stocks, respectively).
